# Supplementary material for: Refined Mechanism of Mycoplasma mobile Gliding Based on Structure, ATPase Activity, and Sialic Acid Binding of Machinery
Source: PubMed Central journal article supplement (PMC6935860; doi:10.1128/mbio.02846-19), 2019-12-24
Supplement: mBio.02846-19-sf003.pdf [file mBio.02846-19-sf003.pdf]

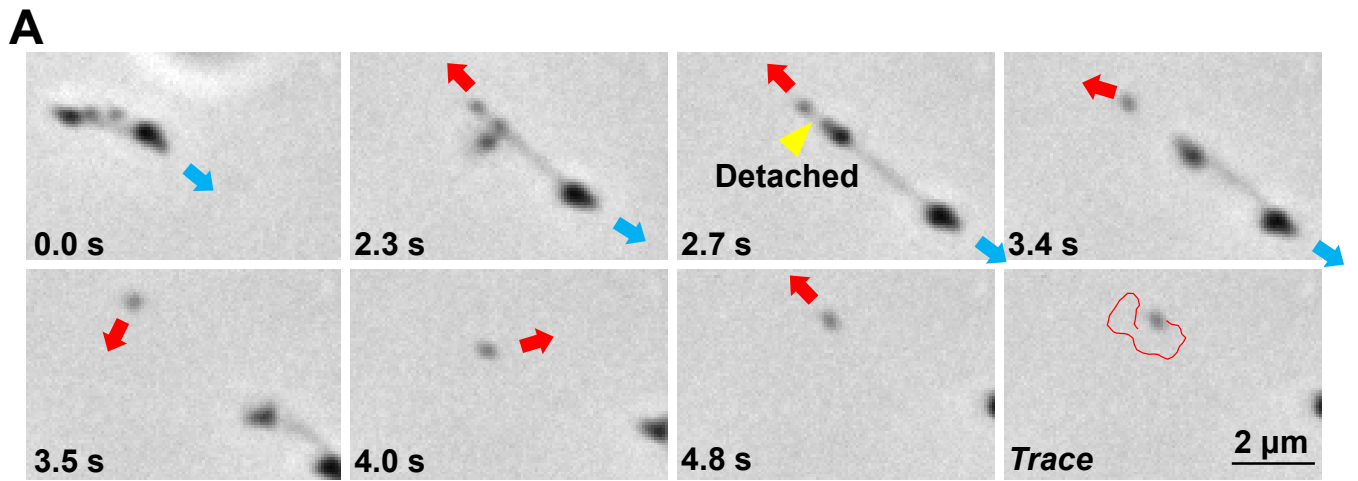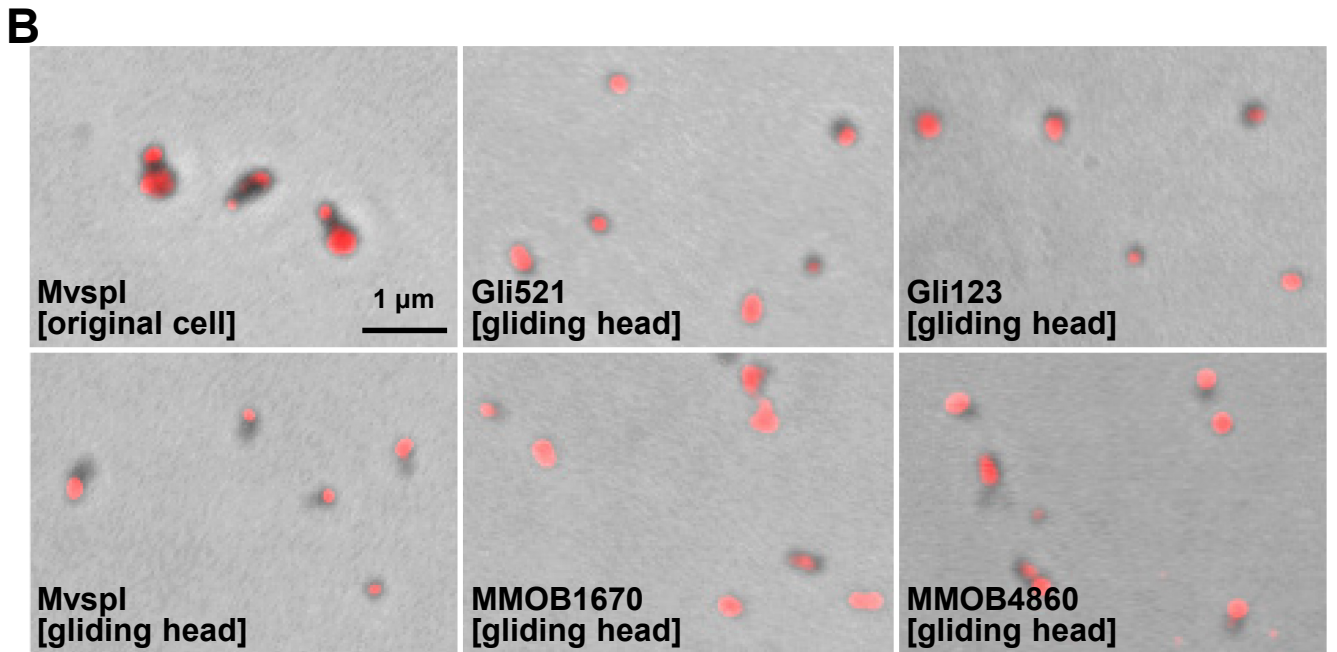

**FIG S3**
